# Supplementary material
Source: PubMed Central journal article supplement (PMC4529053)
Supplement: Supp_Data.pdf [file Supp_Data.pdf]

# Supplementary Data

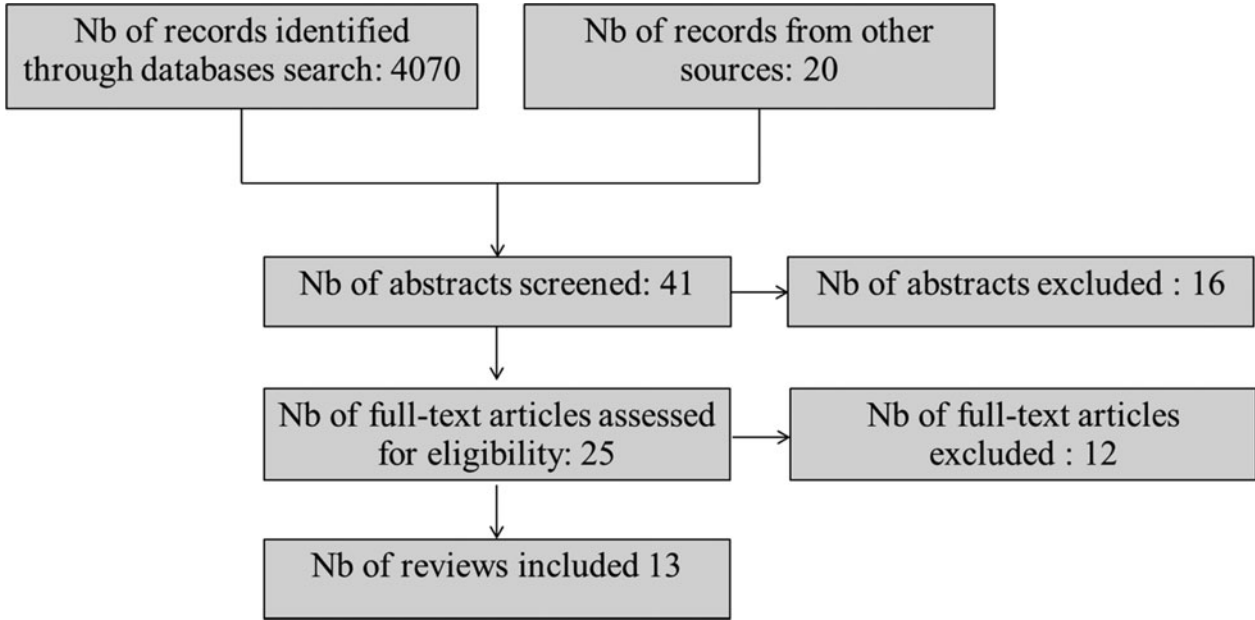

Supplementary Figure 1. Flow chart of review screening and selection process.

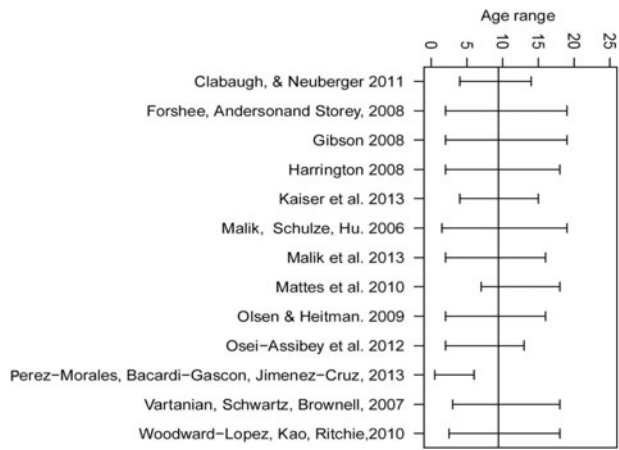

**Supplementary Graph 1. Age ranges of included reviews and meta-analyses on sugar-sweetened beverages consumption and weight gain, overweight, and obesity among children and adolescents.**

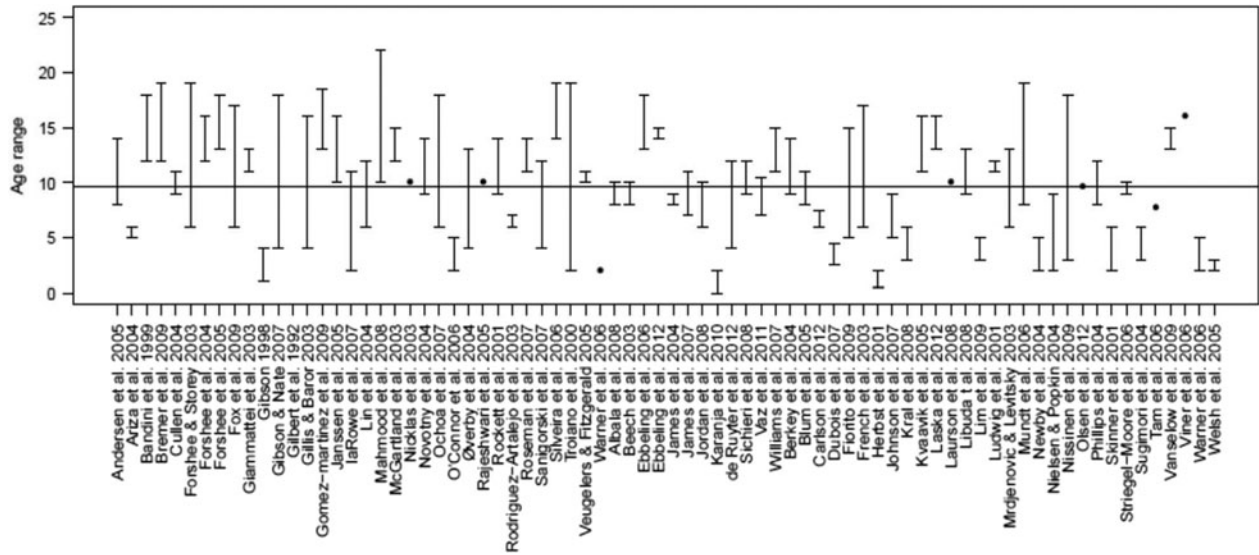

Supplementary Graph 2. Age ranges of studies cited in included reviews and meta-analyses on sugar-sweetened beverages consumption and weight gain, overweight, and obesity among children and adolescents.

**Supplementary Table 1. Quality Assessment: AMSTAR Scores**

| AMSTAR questions                                                                                     | Authors and dates              |                                     |               |                   |                              |                             |                             |                              |                           |                                    |                                     | Total                           |                                      |    |     |
|------------------------------------------------------------------------------------------------------|--------------------------------|-------------------------------------|---------------|-------------------|------------------------------|-----------------------------|-----------------------------|------------------------------|---------------------------|------------------------------------|-------------------------------------|---------------------------------|--------------------------------------|----|-----|
|                                                                                                      | Clabaugh, and Neuberger (2011) | Forshee, Anderson and Storey (2008) | Gibson (2008) | Harrington (2008) | Kaiser and colleagues (2013) | Malik and colleagues (2006) | Malik and colleagues (2013) | Mattes and colleagues (2010) | Olsen and Heitmann (2009) | Osei-Assibey and colleagues (2012) | Perez-Morales and colleagues (2013) | Vartanian and colleagues (2007) | Woodward-Lopez and colleagues (2010) | N  | %   |
| 1. Was an "a priori" design provided?                                                                | +                              | +                                   | +             | +                 | +                            | +                           | +                           | +                            | +                         | +                                  | +                                   | +                               | +                                    | 13 | 100 |
| 2. Was there duplicate study selection and data extraction?                                          | -                              | -                                   | -             | -                 | +                            | -                           | +                           | -                            | -                         | +                                  | +                                   | -                               | +                                    | 5  | 38  |
| 3. Was a comprehensive literature search performed?                                                  | +                              | +                                   | +             | -                 | +                            | -                           | +                           | +                            | +                         | +                                  | -                                   | +                               | -                                    | 9  | 69  |
| 4. Was the status of publication (i.e., gray literature) used as an inclusion criterion?             | -                              | +                                   | -             | -                 | +                            | -                           | -                           | +                            | -                         | -                                  | -                                   | +                               | -                                    | 4  | 31  |
| 5. Was a list of studies (included and excluded) provided?                                           | -                              | -                                   | -             | -                 | +                            | -                           | +                           | +                            | -                         | -                                  | +                                   | -                               | -                                    | 4  | 31  |
| 6. Were the characteristics of the included studies provided?                                        | +                              | +                                   | +             | +                 | +                            | +                           | +                           | +                            | +                         | +                                  | +                                   | -                               | -                                    | 11 | 85  |
| 7. Was the scientific quality of the included studies assessed and documented?                       | +                              | +                                   | -             | -                 | +                            | -                           | +                           | -                            | +                         | +                                  | -                                   | -                               | +                                    | 6  | 46  |
| 8. Was the scientific quality of the included studies used appropriately in formulating conclusions? | +                              | -                                   | -             | -                 | -                            | -                           | +                           | +                            | +                         | +                                  | -                                   | -                               | +                                    | 5  | 38  |
| 9. Were the methods used to combine the findings of studies appropriate?                             | N/A                            | +                                   | N/A           | N/A               | +                            | N/A                         | +                           | +                            | N/A                       | N/A                                | N/A                                 | +                               | N/A                                  | 5  | 100 |
| 10. Was the likelihood of publication bias assessed?                                                 | -                              | +                                   | -             | -                 | +                            | -                           | +                           | -                            | -                         | -                                  | -                                   | +                               | -                                    | 4  | 31  |
| 11. Was the conflict of interest included?                                                           | -                              | -                                   | -             | -                 | -                            | -                           | -                           | -                            | -                         | -                                  | -                                   | +                               | -                                    | 2  | 15  |
| AMSTAR score <sup>a</sup>                                                                            | 5                              | 7                                   | 3             | 2                 | 9                            | 2                           | 9                           | 7                            | 4                         | 6                                  | 4                                   | 6                               | 4                                    |    |     |

Maximum AMSTAR score is 11 for meta-analysis and 10 for reviews; (+) when the answer was "yes"; (-) when the answer was "no" or "can't answer."

<sup>a</sup>Out of five meta-analyses.

AMSTAR, Assessment of Multiple SysTematic Reviews; N/A, not applicable.

**Supplementary Table 2. Excluded Studies After Full-Text Selection**

|     | <b>Authors</b>                   | <b>Date</b> | <b>Title</b>                                                                                                                                                               | <b>Reasons for exclusion</b>                                                                                            |
|-----|----------------------------------|-------------|----------------------------------------------------------------------------------------------------------------------------------------------------------------------------|-------------------------------------------------------------------------------------------------------------------------|
| 1.  | Bachman, Baranow-ski and Nicklas | 2006        | Is there an association between sweetened beverages and adiposity?                                                                                                         | The authors state that the review is systematic; however, the method section is missing (classified as not systematic). |
| 2.  | Bray                             | 2012        | Fructose and risk of cardiometabolic disease.                                                                                                                              | Exposure: fructose and outcome: CVD. The review include also other review and meta-analysis (review of review).         |
| 3.  | Forshee and colleagues.          | 2007        | A critical examination of the evidence relating high fructose corn syrup and weight gain                                                                                   | Not primary about beverages                                                                                             |
| 4.  | Hu                               | 2013        | Resolved: There is sufficient scientific evidence that decreasing sugar-sweetened beverage consumption will reduce the prevalence of obesity and obesity-related diseases. | Not systematic. The review include also other reviews and meta-analyses (review of review).                             |
| 5.  | Libuda and Kersting              | 2009        | Soft drinks and body weight development in childhood: Is there a relationship?                                                                                             | Not systematic                                                                                                          |
| 6.  | Malik and colleagues.            | 2010        | Sugar-sweetened beverages and risk of metabolic syndrome and type 2 diabetes.                                                                                              | Meta-analysis on SSB and metabolic syndrome and type 2 diabetes, not weight                                             |
| 7.  | Malik, and Hu                    | 2012        | Sweeteners and risk of obesity and type 2 diabetes: The role of sugar-sweetened beverages.                                                                                 | Not systematic                                                                                                          |
| 8.  | Pereira                          | 2006        | The possible role of sugar-sweetened beverages in obesity etiology: A review of the evidence.                                                                              | Not systematic                                                                                                          |
| 9.  | Ruxton, Gardner and McNulty      | 2010        | Is sugar consumption detrimental to health? A review of the evidence 1995–2006.                                                                                            | About sugar and not specific to obesity or weight gain                                                                  |
| 10. | Te Morenga and colleagues        | 2013        | Dietary sugars and body weight: Systematic review and meta-analyses of randomised controlled trials and cohort studies.                                                    | Not specific to SSBs—sugar in general                                                                                   |
| 11. | Van Dam and colleagues           | 2007        | Carbohydrate intake and obesity.                                                                                                                                           | Exposure: carbohydrate intake<br>Includes also other review and meta-analysis (review of review)                        |
| 12. | Wolff and colleagues             | 2008        | Soft drinks and weight gain: How strong is the link?                                                                                                                       | Not systematic                                                                                                          |

SSBs, sugar sweetened beverages.

**Supplementary Table 3. Longitudinal Studies (n = 30) on Children and Adolescents Cited in Included Reviews and Meta-Analyses**

| Included reviews                    | Primary research articles included in review articles |                       |                          |                            |                          |                         |                             |                         |                       |                             |                        |                          |                             |                      |                         |                               |                           |                        |                          |                               |                            |                           |                          |                                 |                             |                            |                           |                       |                         |                        |   |   |   |   |  |   |
|-------------------------------------|-------------------------------------------------------|-----------------------|--------------------------|----------------------------|--------------------------|-------------------------|-----------------------------|-------------------------|-----------------------|-----------------------------|------------------------|--------------------------|-----------------------------|----------------------|-------------------------|-------------------------------|---------------------------|------------------------|--------------------------|-------------------------------|----------------------------|---------------------------|--------------------------|---------------------------------|-----------------------------|----------------------------|---------------------------|-----------------------|-------------------------|------------------------|---|---|---|---|--|---|
|                                     | Authors, date, and country                            |                       |                          |                            |                          |                         |                             |                         |                       |                             |                        |                          |                             |                      |                         |                               |                           |                        |                          |                               |                            |                           |                          |                                 |                             |                            |                           |                       |                         |                        |   |   |   |   |  |   |
| Authors and date                    | Berkey et al. 2004, USA                               | Blum et al. 2005, USA | Carlson et al. 2012, USA | Dubois et al. 2007, Canada | Foritto et al. 2009, USA | French et al. 2003, USA | Herbst et al. 2001, Germany | Johnson et al. 2007, UK | Kral et al. 2008, USA | Kyaavik et al. 2005, Norway | Laska et al. 2012, USA | Laurson et al. 2008, USA | Libuda et al. 2008, Germany | Lim et al. 2009, USA | Ludwig et al. 2001, USA | Mrdjenovic Levitsky 2003, USA | Mundt et al. 2006, Canada | Newby et al. 2004, USA | Nielsen Popkin 2004, USA | Nissinen et al. 2009, Finland | Olsen et al. 2012, Denmark | Phillips et al. 2004, USA | Skinner et al. 2001, USA | Striegel-Moore et al. 2006, USA | Sugimori et al. 2004, Japan | Tam et al. 2006, Australia | Vanselow et al. 2009, USA | Viner et al. 2006, UK | Warner et al. 2006, USA | Veish et al. 2005, USA |   |   |   |   |  |   |
| Clabaugh, and Neuberger (2011)      | x                                                     |                       |                          |                            |                          |                         |                             |                         |                       |                             |                        |                          |                             |                      | x                       |                               |                           |                        |                          |                               |                            |                           |                          |                                 |                             |                            |                           |                       |                         |                        |   |   |   |   |  |   |
| Forshee and colleagues (2008)       | x                                                     | x                     |                          |                            |                          |                         |                             |                         |                       |                             |                        |                          | x                           |                      | x                       | x                             | x                         |                        |                          |                               |                            | x                         |                          |                                 |                             |                            |                           |                       |                         |                        |   |   |   |   |  |   |
| Gibson (2008)                       | x                                                     | x                     |                          |                            |                          |                         |                             | x                       |                       |                             |                        |                          |                             |                      | x                       | x                             | x                         |                        |                          |                               |                            |                           |                          |                                 |                             |                            |                           |                       |                         |                        |   | x |   |   |  |   |
| Harrington (2008)                   | x                                                     |                       |                          |                            |                          | x                       |                             |                         |                       |                             |                        |                          |                             |                      | x                       |                               |                           |                        |                          |                               |                            |                           |                          |                                 |                             |                            |                           |                       |                         |                        |   |   |   |   |  |   |
| Kaiser and colleagues (2013)        |                                                       |                       |                          |                            |                          |                         |                             |                         |                       |                             |                        |                          |                             |                      |                         |                               |                           |                        |                          |                               |                            |                           |                          |                                 |                             |                            |                           |                       |                         |                        |   |   |   |   |  |   |
| Malik and colleagues (2006)         | x                                                     | x                     |                          |                            |                          |                         |                             |                         |                       |                             |                        |                          |                             |                      | x                       |                               |                           |                        |                          |                               |                            |                           |                          |                                 |                             |                            |                           |                       |                         |                        |   |   | x |   |  |   |
| Malik and colleagues (2013)         | x                                                     | x                     |                          |                            |                          |                         |                             |                         |                       |                             |                        |                          |                             |                      | x                       |                               |                           |                        |                          |                               |                            |                           |                          |                                 |                             |                            |                           |                       |                         |                        |   |   |   |   |  |   |
| Mattes and colleagues (2010)        |                                                       |                       |                          |                            |                          |                         |                             |                         |                       |                             |                        |                          |                             |                      |                         |                               |                           |                        |                          |                               |                            |                           |                          |                                 |                             |                            |                           |                       |                         |                        |   |   |   |   |  |   |
| Olsen and Heitman, (2009)           | x                                                     | x                     |                          |                            |                          |                         |                             |                         |                       |                             |                        |                          |                             |                      | x                       |                               |                           |                        |                          |                               |                            |                           |                          |                                 |                             |                            |                           |                       |                         |                        |   |   |   | x |  |   |
| Osei-Assibey and colleagues (2012)  |                                                       |                       |                          |                            |                          |                         |                             |                         |                       |                             |                        |                          |                             |                      |                         |                               |                           |                        |                          |                               |                            |                           |                          |                                 |                             |                            |                           |                       |                         |                        |   |   |   |   |  |   |
| Perez-Morales and colleagues (2013) |                                                       |                       |                          |                            |                          |                         |                             |                         |                       |                             |                        |                          |                             |                      |                         |                               |                           |                        |                          |                               |                            |                           |                          |                                 |                             |                            |                           |                       |                         |                        |   |   |   |   |  | x |
| Vartanian and colleagues (2007)     | x                                                     | x                     |                          |                            |                          |                         |                             |                         |                       |                             |                        |                          |                             |                      | x                       |                               |                           |                        |                          |                               |                            |                           |                          |                                 |                             |                            |                           |                       |                         |                        |   |   |   |   |  |   |
| Woodward-Lopez and colleagues(2010) | x                                                     | x                     |                          |                            |                          |                         |                             |                         |                       |                             |                        |                          |                             |                      | x                       |                               |                           |                        |                          |                               |                            |                           |                          |                                 |                             |                            |                           |                       |                         |                        |   |   |   |   |  | x |
| Total                               | 9                                                     | 8                     | 1                        | 2                          | 1                        | 1                       | 1                           | 3                       | 2                     | 1                           | 1                      | 2                        | 3                           | 2                    | 9                       | 6                             | 3                         | 8                      | 1                        | 1                             | 1                          | 1                         | 6                        | 1                               | 6                           | 1                          | 2                         | 2                     | 2                       | 1                      | 1 | 6 | 6 |   |  |   |

## Supplementary Table 4. Intervention Studies (n = 12) on Children and Adolescents Cited in Included Reviews and Meta-Analyses

| Included reviews                     | Primary research articles included in review articles |                           |                                      |                              |                          |                          |                            |                             |                                      |                                 |                           |                              |
|--------------------------------------|-------------------------------------------------------|---------------------------|--------------------------------------|------------------------------|--------------------------|--------------------------|----------------------------|-----------------------------|--------------------------------------|---------------------------------|---------------------------|------------------------------|
|                                      | Authors, date and country                             |                           |                                      |                              |                          |                          |                            |                             |                                      |                                 |                           |                              |
|                                      | Albala et al.<br>2008, USA                            | Beech et al.<br>2003, USA | Ebbeling et al.<br>2006, USA (pilot) | Ebbeling et al.<br>2012, USA | James et al.<br>2004, UK | James et al.<br>2007, UK | Jordan et al.<br>2008, USA | Karanja et al.<br>2010, USA | de Ruyter et al.<br>2012, Netherland | Sichieri et al.<br>2008, Brazil | Vaz et al.<br>2011, India | Williams et al.<br>2007, USA |
| Authors and date                     |                                                       |                           |                                      |                              |                          |                          |                            |                             |                                      |                                 |                           |                              |
| Clabaugh and Neuberger (2011)        |                                                       |                           | x                                    |                              |                          | x                        |                            |                             |                                      |                                 |                           |                              |
| Forshee and colleagues (2008)        |                                                       |                           | x                                    |                              | x                        |                          |                            |                             |                                      |                                 |                           |                              |
| Gibson (2008)                        |                                                       |                           | x                                    |                              | x                        |                          |                            |                             |                                      | x                               |                           |                              |
| Harrington (2008)                    |                                                       |                           | x                                    |                              | x                        |                          |                            |                             |                                      |                                 |                           |                              |
| Kaiser and colleagues (2013)         |                                                       |                           |                                      | x                            |                          |                          |                            |                             | x                                    |                                 | x                         |                              |
| Malik and colleagues (2006)          |                                                       |                           | x                                    |                              | x                        |                          |                            |                             |                                      |                                 |                           |                              |
| Malik and colleagues (2013)          |                                                       |                           | x                                    | x                            | x                        |                          |                            |                             | x                                    | x                               |                           |                              |
| Mattes et al. 2010                   | x                                                     |                           | x                                    |                              | x                        | x                        |                            |                             |                                      | x                               |                           | x                            |
| Olsen and Heitman. (2009)            |                                                       |                           | x                                    |                              | x                        |                          |                            |                             |                                      |                                 |                           |                              |
| Osei-Assibey and colleagues (2012)   |                                                       |                           |                                      |                              | x                        |                          |                            | x                           |                                      |                                 |                           |                              |
| Perez-Morales and colleagues (2013)  |                                                       |                           |                                      |                              |                          |                          |                            |                             |                                      |                                 |                           |                              |
| Vartanian and colleagues (2007)      |                                                       |                           | x                                    |                              | x                        |                          |                            |                             |                                      |                                 |                           |                              |
| Woodward-Lopez and colleagues (2010) |                                                       | x                         | x                                    |                              | x                        |                          | x                          |                             |                                      |                                 |                           |                              |
| Total                                | 1                                                     | 1                         | 10                                   | 2                            | 10                       | 2                        | 1                          | 1                           | 2                                    | 3                               | 1                         | 1                            |
