# Supplementary material
Source: PubMed Central journal article supplement (PMC4529053)
Supplement: Supp_Fig1.pdf [file Supp_Fig1.pdf]

# Supplementary Data

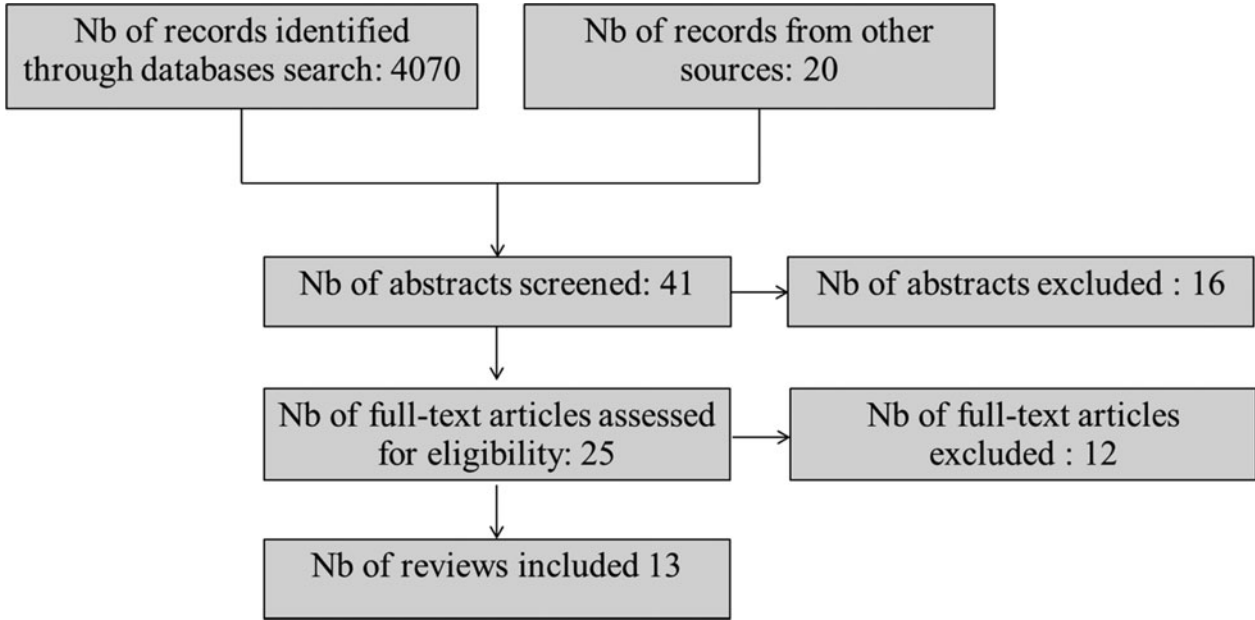

Supplementary Figure 1. Flow chart of review screening and selection process.
