# Supplementary material
Source: PubMed Central journal article supplement (PMC4529053)
Supplement: Supp_Graph1.pdf [file Supp_Graph1.pdf]

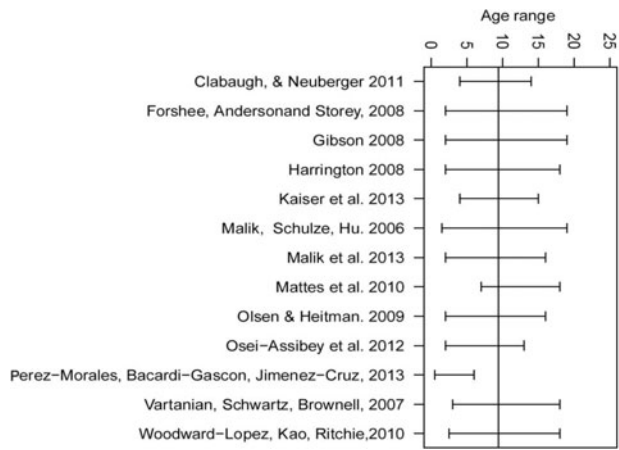

**Supplementary Graph 1. Age ranges of included reviews and meta-analyses on sugar-sweetened beverages consumption and weight gain, overweight, and obesity among children and adolescents.**
