# Supplementary material
Source: PubMed Central journal article supplement (PMC4529053)
Supplement: Supp_Graph2.pdf [file Supp_Graph2.pdf]

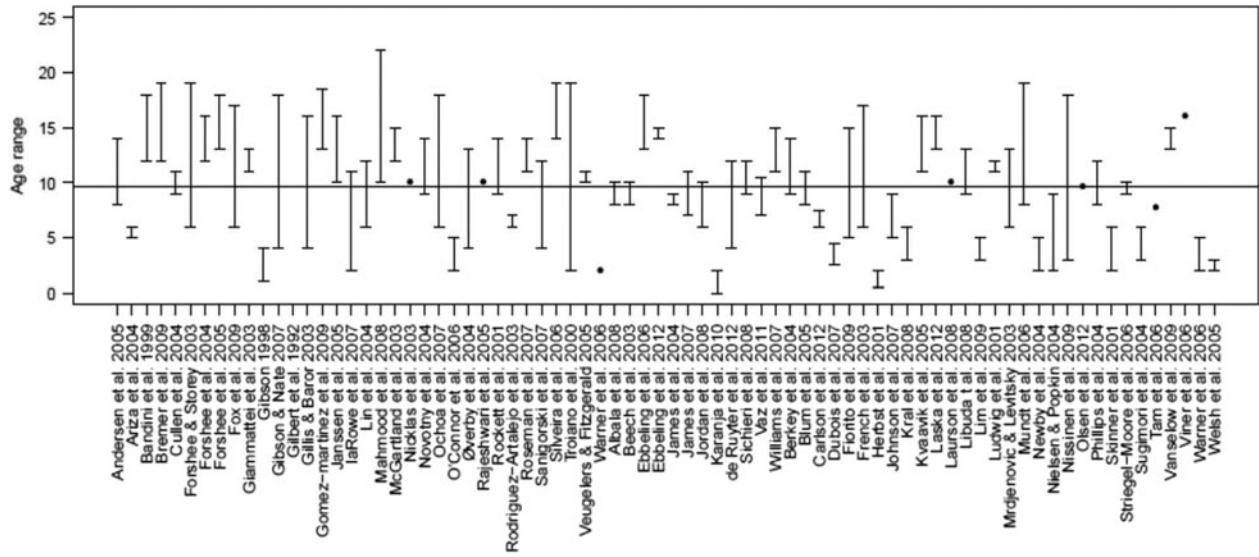

Supplementary Graph 2. Age ranges of studies cited in included reviews and meta-analyses on sugar-sweetened beverages consumption and weight gain, overweight, and obesity among children and adolescents.
