# Supplementary material
Source: PubMed Central journal article supplement (PMC4529053)
Supplement: Supp_Table1.pdf [file Supp_Table1.pdf]

**Supplementary Table 1. Quality Assessment: AMSTAR Scores**

| AMSTAR questions                                                                                     | Authors and dates              |                                     |               |                   |                              |                             |                             |                              |                           |                                    |                                     | Total                           |                                      |    |     |
|------------------------------------------------------------------------------------------------------|--------------------------------|-------------------------------------|---------------|-------------------|------------------------------|-----------------------------|-----------------------------|------------------------------|---------------------------|------------------------------------|-------------------------------------|---------------------------------|--------------------------------------|----|-----|
|                                                                                                      | Clabaugh, and Neuberger (2011) | Forshee, Anderson and Storey (2008) | Gibson (2008) | Harrington (2008) | Kaiser and colleagues (2013) | Malik and colleagues (2006) | Malik and colleagues (2013) | Mattes and colleagues (2010) | Olsen and Heitmann (2009) | Osei-Assibey and colleagues (2012) | Perez-Morales and colleagues (2013) | Vartanian and colleagues (2007) | Woodward-Lopez and colleagues (2010) | N  | %   |
| 1. Was an "a priori" design provided?                                                                | +                              | +                                   | +             | +                 | +                            | +                           | +                           | +                            | +                         | +                                  | +                                   | +                               | +                                    | 13 | 100 |
| 2. Was there duplicate study selection and data extraction?                                          | -                              | -                                   | -             | -                 | +                            | -                           | +                           | -                            | -                         | +                                  | +                                   | -                               | +                                    | 5  | 38  |
| 3. Was a comprehensive literature search performed?                                                  | +                              | +                                   | +             | -                 | +                            | -                           | +                           | +                            | +                         | +                                  | -                                   | +                               | -                                    | 9  | 69  |
| 4. Was the status of publication (i.e., gray literature) used as an inclusion criterion?             | -                              | +                                   | -             | -                 | +                            | -                           | +                           | +                            | -                         | -                                  | -                                   | +                               | -                                    | 4  | 31  |
| 5. Was a list of studies (included and excluded) provided?                                           | -                              | -                                   | -             | -                 | +                            | -                           | +                           | +                            | -                         | -                                  | +                                   | -                               | -                                    | 4  | 31  |
| 6. Were the characteristics of the included studies provided?                                        | +                              | +                                   | +             | +                 | +                            | +                           | +                           | +                            | +                         | +                                  | +                                   | -                               | -                                    | 11 | 85  |
| 7. Was the scientific quality of the included studies assessed and documented?                       | +                              | +                                   | -             | -                 | +                            | -                           | +                           | -                            | +                         | +                                  | -                                   | -                               | +                                    | 6  | 46  |
| 8. Was the scientific quality of the included studies used appropriately in formulating conclusions? | +                              | -                                   | -             | -                 | -                            | -                           | +                           | +                            | +                         | +                                  | -                                   | -                               | +                                    | 5  | 38  |
| 9. Were the methods used to combine the findings of studies appropriate?                             | N/A                            | +                                   | N/A           | N/A               | +                            | N/A                         | +                           | +                            | N/A                       | N/A                                | N/A                                 | +                               | N/A                                  | 5  | 100 |
| 10. Was the likelihood of publication bias assessed?                                                 | -                              | +                                   | -             | -                 | +                            | -                           | +                           | -                            | -                         | -                                  | -                                   | +                               | -                                    | 4  | 31  |
| 11. Was the conflict of interest included?                                                           | -                              | -                                   | -             | -                 | -                            | -                           | -                           | -                            | -                         | -                                  | -                                   | +                               | -                                    | 2  | 15  |
| AMSTAR score <sup>a</sup>                                                                            | 5                              | 7                                   | 3             | 2                 | 9                            | 2                           | 9                           | 7                            | 4                         | 6                                  | 4                                   | 6                               | 4                                    |    |     |

Maximum AMSTAR score is 11 for meta-analysis and 10 for reviews; (+) when the answer was "yes"; (-) when the answer was "no" or "can't answer."

<sup>a</sup>Out of five meta-analyses.

AMSTAR, Assessment of Multiple SysTematic Reviews; N/A, not applicable.
