# Supplementary material
Source: PubMed Central journal article supplement (PMC4529053)
Supplement: Supp_Table2.pdf [file Supp_Table2.pdf]

**Supplementary Table 2. Excluded Studies After Full-Text Selection**

|     | <b>Authors</b>                   | <b>Date</b> | <b>Title</b>                                                                                                                                                               | <b>Reasons for exclusion</b>                                                                                            |
|-----|----------------------------------|-------------|----------------------------------------------------------------------------------------------------------------------------------------------------------------------------|-------------------------------------------------------------------------------------------------------------------------|
| 1.  | Bachman, Baranow-ski and Nicklas | 2006        | Is there an association between sweetened beverages and adiposity?                                                                                                         | The authors state that the review is systematic; however, the method section is missing (classified as not systematic). |
| 2.  | Bray                             | 2012        | Fructose and risk of cardiometabolic disease.                                                                                                                              | Exposure: fructose and outcome: CVD. The review include also other review and meta-analysis (review of review).         |
| 3.  | Forshee and colleagues.          | 2007        | A critical examination of the evidence relating high fructose corn syrup and weight gain                                                                                   | Not primary about beverages                                                                                             |
| 4.  | Hu                               | 2013        | Resolved: There is sufficient scientific evidence that decreasing sugar-sweetened beverage consumption will reduce the prevalence of obesity and obesity-related diseases. | Not systematic. The review include also other reviews and meta-analyses (review of review).                             |
| 5.  | Libuda and Kersting              | 2009        | Soft drinks and body weight development in childhood: Is there a relationship?                                                                                             | Not systematic                                                                                                          |
| 6.  | Malik and colleagues.            | 2010        | Sugar-sweetened beverages and risk of metabolic syndrome and type 2 diabetes.                                                                                              | Meta-analysis on SSB and metabolic syndrome and type 2 diabetes, not weight                                             |
| 7.  | Malik, and Hu                    | 2012        | Sweeteners and risk of obesity and type 2 diabetes: The role of sugar-sweetened beverages.                                                                                 | Not systematic                                                                                                          |
| 8.  | Pereira                          | 2006        | The possible role of sugar-sweetened beverages in obesity etiology: A review of the evidence.                                                                              | Not systematic                                                                                                          |
| 9.  | Ruxton, Gardner and McNulty      | 2010        | Is sugar consumption detrimental to health? A review of the evidence 1995–2006.                                                                                            | About sugar and not specific to obesity or weight gain                                                                  |
| 10. | Te Morenga and colleagues        | 2013        | Dietary sugars and body weight: Systematic review and meta-analyses of randomised controlled trials and cohort studies.                                                    | Not specific to SSBs—sugar in general                                                                                   |
| 11. | Van Dam and colleagues           | 2007        | Carbohydrate intake and obesity.                                                                                                                                           | Exposure: carbohydrate intake<br>Includes also other review and meta-analysis (review of review)                        |
| 12. | Wolff and colleagues             | 2008        | Soft drinks and weight gain: How strong is the link?                                                                                                                       | Not systematic                                                                                                          |

SSBs, sugar sweetened beverages.
